# Supplementary material
Source: PubMed Central journal article supplement (PMC4928586)

**a**

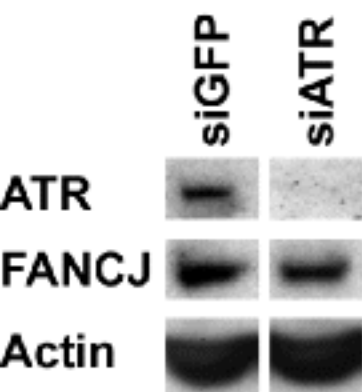

**b**

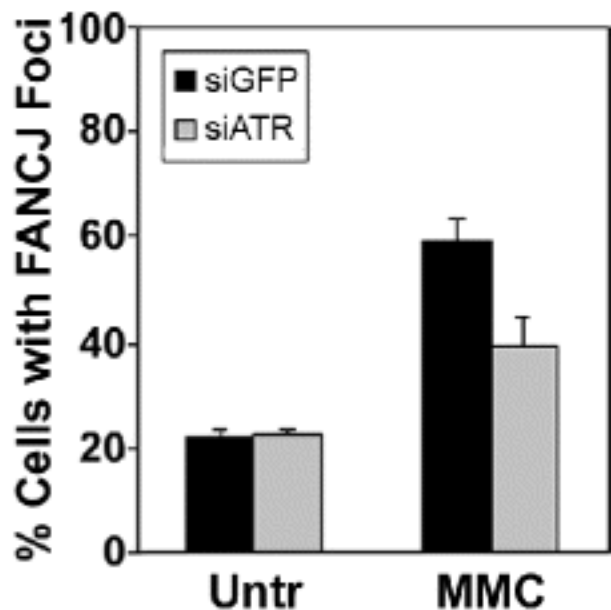

## FANCD2/BRIP1 RECRUITMENT AND REGULATION OF FANCD2 IN DNA DAMAGE RESPONSES

Chromosoma

F Zhang, Q Fan, K Ren, AD Auerbach, PR Andreassen

Corresponding Author: Paul.Andreassen@cchmc.org

# Suppl. Fig. 2, Zhang et al.

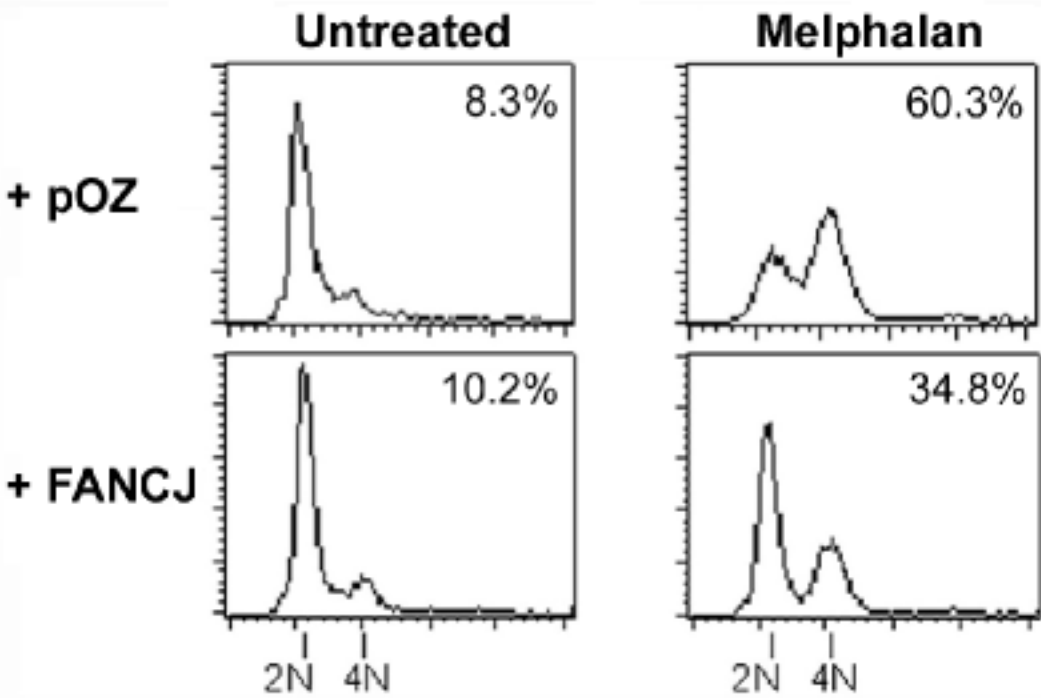

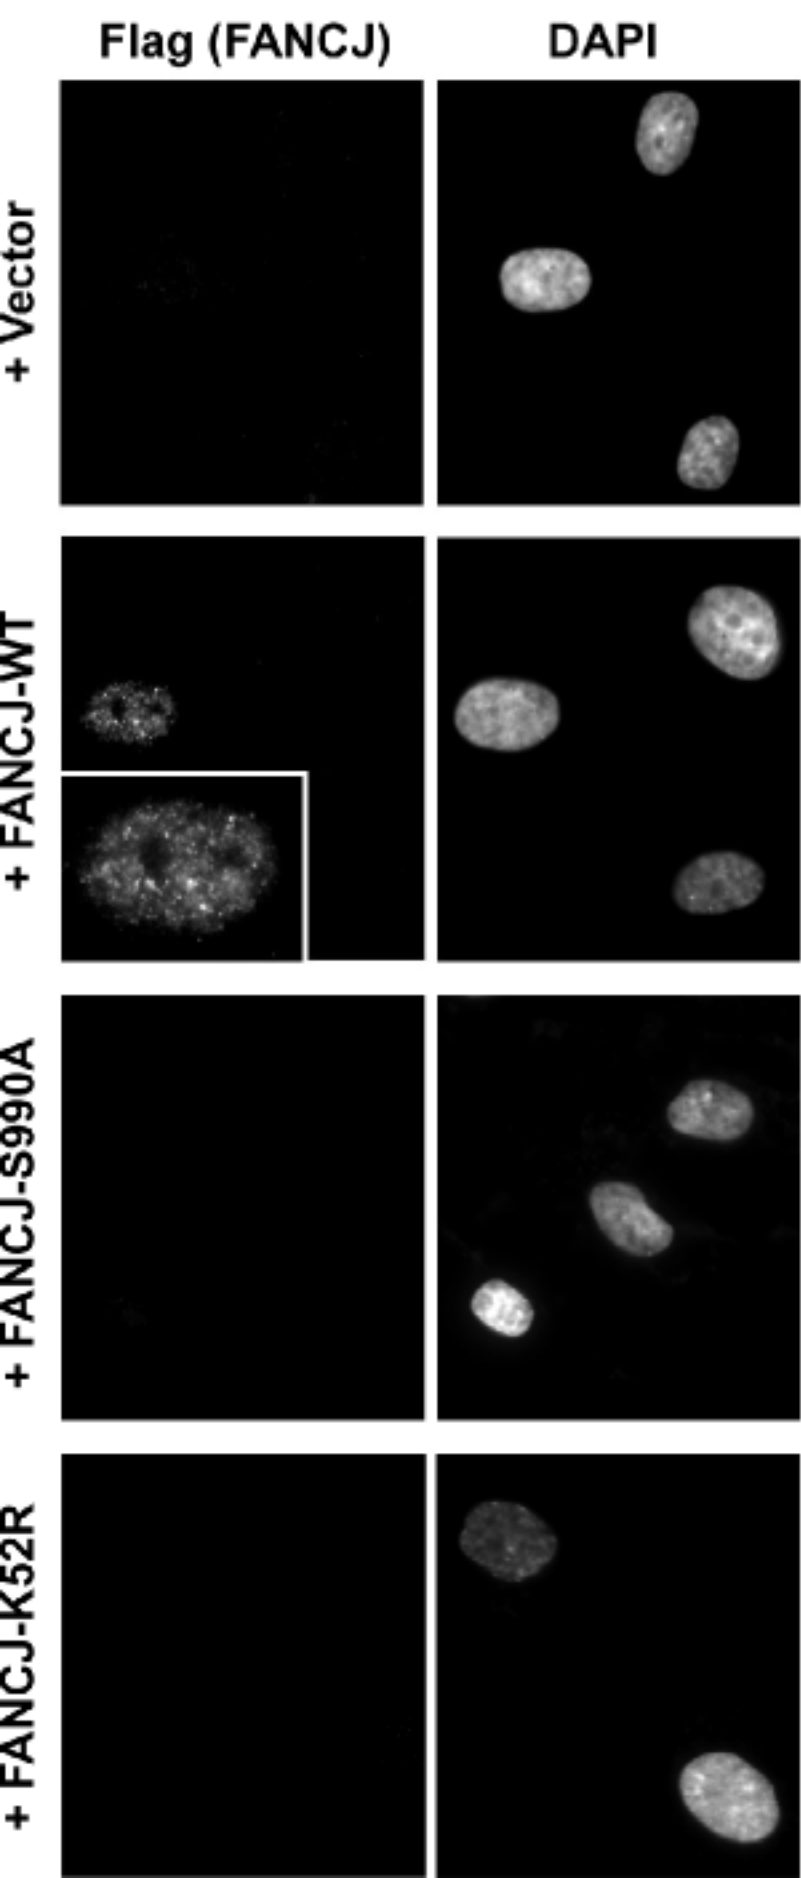

# Suppl. Fig. 4, Zhang et al.

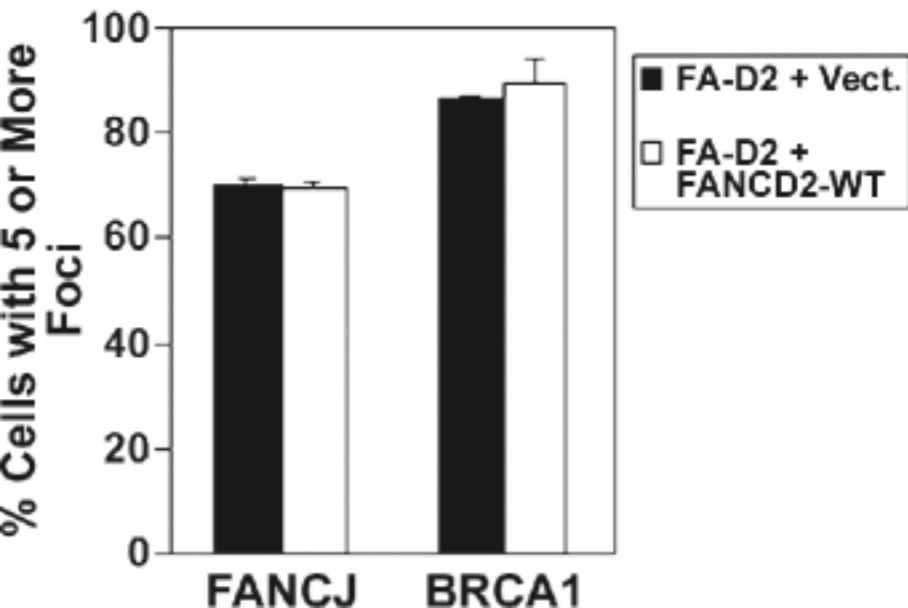

# Suppl. Fig. 5, Zhang et al.

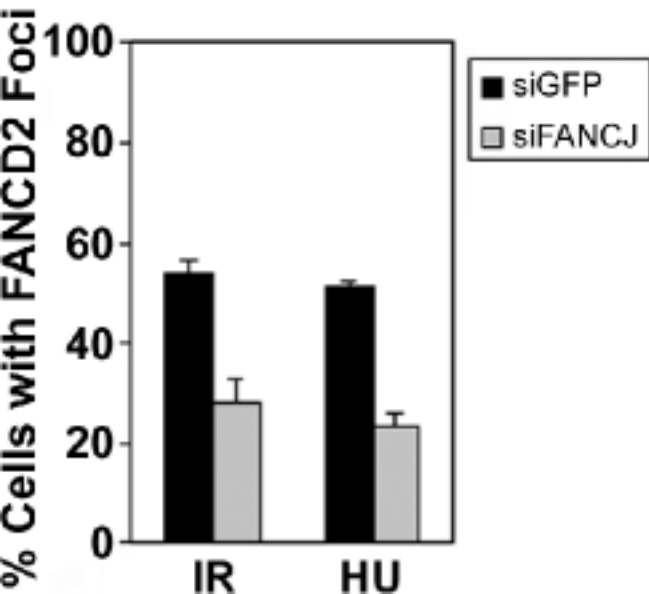

Supplement: NIHMS797104-supplement-2.pdf [file NIHMS797104-supplement-2.pdf]
